# Supplementary material for: Toll-Like Receptor 4 Agonist Injection With Concurrent Radiotherapy in Patients With Metastatic Soft Tissue Sarcoma: A Phase 1 Nonrandomized Controlled Trial
Source: PubMed Central journal article supplement (PMC10570919; doi:10.1001/jamaoncol.2023.4015), 2023-10-12
Supplement: jamaoncol-e234015-s003.pdf [file jamaoncol-e234015-s003.pdf]

## Data Sharing Statement

Seo. Toll-Like Receptor 4 Agonist Injection With Concurrent Radiotherapy in Patients With Metastatic Soft Tissue Sarcoma. *JAMA Oncol.* Published October 12, 2023.  
doi:10.1001/jamaoncol.2023.4015

### Data

**Data available:** No
